# Supplementary material for: Sp1 Plays an Important Role in Vascular Calcification Both In Vivo and In Vitro
Source: PubMed Central journal article supplement — J Am Heart Assoc. 2018 Mar 23;7(6):e007555. doi: 10.1161/JAHA.117.007555 (PMC5907546; doi:10.1161/jaha.117.007555), 2018-03-23
Supplement: JAH3-7-e007555-s001.pdf [file JAH3-7-e007555-s001.pdf]

# **SUPPLEMENTAL MATERIAL**

**Table S1. The promoter sequences used in luciferase assays.**

|                                              |                                                                                                                                                                                                                                                                                                                                                                                                                                                                                                                                                                                                                                                                                                                                                                                                                                                                                                                                                                                                                                                                                                                                                                                                                                                                                                                                                                                                                                                                                                                                                                                                                                                                                                                                                                                                                                                                                                                                                           |
|----------------------------------------------|-----------------------------------------------------------------------------------------------------------------------------------------------------------------------------------------------------------------------------------------------------------------------------------------------------------------------------------------------------------------------------------------------------------------------------------------------------------------------------------------------------------------------------------------------------------------------------------------------------------------------------------------------------------------------------------------------------------------------------------------------------------------------------------------------------------------------------------------------------------------------------------------------------------------------------------------------------------------------------------------------------------------------------------------------------------------------------------------------------------------------------------------------------------------------------------------------------------------------------------------------------------------------------------------------------------------------------------------------------------------------------------------------------------------------------------------------------------------------------------------------------------------------------------------------------------------------------------------------------------------------------------------------------------------------------------------------------------------------------------------------------------------------------------------------------------------------------------------------------------------------------------------------------------------------------------------------------------|
| <p>BMP2-LUC<br/>(full length)<br/>2280bp</p> | <p>TAATTTCCCTCTGTGGGTTGCTAATCCGATTTAGGTGAAC<br/> GAACCTAGAGTTATTTTAGCTCCCCGACTGAAAAGCTAG<br/> CACACGTGGGTAAAAAATCATTAAAGCCCCTGCTTCTG<br/> GTCTTTCTCGGTCTTTGCTTTGCAAACCTGGAAAGATCTG<br/> GTTTACAACGTAACGTTATTTACTCTGGTCTTCTACAGG<br/> AATGCTCAGCCATAGTTTTGGGGGTCCTGTGGGTAGCC<br/> AGTGGTGGTACTATGAAGGCTCCTGAATGTAGGGAGAAA<br/> TGGAAAGATTTCAAAAAGAATCCTGGCTCAGCAGCTTT<br/> GGGGACATTTCCAGCTGAGGAAGAAAACCTGGCTTGGCC<br/> ACAGCCAGAGCCTTACTGCTGGAGACCCAGTGGAGAGA<br/> GAGGACCAGGCAGAAAATTTCAAAGGTCTCAAACCGGAA<br/> TTGTCTTGTTACCTGACTCTGGAGTAGGTGGGTGTGGAA<br/> GGGAAGATAAATATCACAAGTATCGAAGTGATCGCTTCT<br/> ATAAAGAGAATTTCTATTAACCTCTCATTGTCCCCTCACAT<br/> GGACACACACACACACACACACACACACACACACACAT<br/> CACTAGAAGGGATGTCCACTTTACAAGTGTGTATCTATGT<br/> TCAGAAACCTGTACCCGTATTTTTATAATTTACATAAATAA<br/> ATACATATAAAATATATGCATCTTTTTATTAGATTCATTTAT<br/> TTGAATATAAATGTATGAATATTTATAAATGTAATAATGC<br/> ACTCAGATGTGTATCGGCTATTTCTCGACATTTTCTTCTC<br/> ACCATTCAAACAGAAGCGTTTGCTCACATTTTGGCAA<br/> AATGTCTAATAACTTGTAAGTTCTGTTCTTCTTTTAAATGT<br/> GCTCTTACCTAAAACTTCAAACCTCAAGTTGAATATTGG<br/> CCCAATGAGGGAACCTCAGAGGCCAGTGGACTCTGGATT<br/> TGCCCTAGTCTCCCGCAGCTGTGGGCGCGGATCCAGGTC<br/> CCGGGGGTTCGGCTTTCACACTCATCCGGGACGCGACCCC<br/> TTAGCGGCCGCGCGCTCGCCCCGCCCCGCTCCACCGCG<br/> GCCGCCCGTAGGGCGCGCCGTCCACACCCCTGCGCGC<br/> CGTCCCGCCCGCCGGGGATCCCCGGCGCGCTGCGCCT<br/> CCGAGGGGGAGGTGTTTCGGCCACGGCCGGGAGGGAGC<br/> CGGCAGGCGGCGTCTCCTTTAAAAGCCGCGAGCGCCGC<br/> GCCACGGCGCCTCCGTCGTCGCCGCCGAGTCCTCGCC<br/> CTGCCGCGCAGAGCCCTGCTCGCACTGCGCCCGCCGCC<br/> GCTGCGCTTCCCACAGCCCGCCCGGGATTGGCAGCCCC<br/> GGACGTAGCCTCCCCAGGCGACACCAGGCACCGGACGC<br/> CCTCCCGGGCGAAAGACGCGAGGGTACCCCGCGGCTTCG<br/> AGGGACTGGCACGACACGGGTTGGAACCTCAGACTGTG<br/> CGCGCCTGGCGCTGTGGCCTCGGCTGTCCGGGAGAAGC<br/> TAGAGTCGCGGACCGACGCTAAGAACCAGGGAGTCCGGA<br/> GCACAGTCTTACCCTCAATGCGGGGCCACTCTGACCCAG<br/> GAGTGAGCGCCCAAGGCGAGCGGGCGGAAGAGTGAGT<br/> GGACCCAGGCTGCCACAAAAGACACTTGGCCCGAGGG</p> |
|----------------------------------------------|-----------------------------------------------------------------------------------------------------------------------------------------------------------------------------------------------------------------------------------------------------------------------------------------------------------------------------------------------------------------------------------------------------------------------------------------------------------------------------------------------------------------------------------------------------------------------------------------------------------------------------------------------------------------------------------------------------------------------------------------------------------------------------------------------------------------------------------------------------------------------------------------------------------------------------------------------------------------------------------------------------------------------------------------------------------------------------------------------------------------------------------------------------------------------------------------------------------------------------------------------------------------------------------------------------------------------------------------------------------------------------------------------------------------------------------------------------------------------------------------------------------------------------------------------------------------------------------------------------------------------------------------------------------------------------------------------------------------------------------------------------------------------------------------------------------------------------------------------------------------------------------------------------------------------------------------------------------|

|                                                 |                                                                                                                                                                                                                                                                                                                                                                                                                                                                                                                                                                                                                                                                                                                                                                                          |
|-------------------------------------------------|------------------------------------------------------------------------------------------------------------------------------------------------------------------------------------------------------------------------------------------------------------------------------------------------------------------------------------------------------------------------------------------------------------------------------------------------------------------------------------------------------------------------------------------------------------------------------------------------------------------------------------------------------------------------------------------------------------------------------------------------------------------------------------------|
|                                                 | <p>CTCGGAGCGCGAGGTCACCCGGTTTGGCAACCCGAGAC<br/> GCGCGGCTGGACTGTCTCGAGAATGAGCCCCAGGACGC<br/> CGGGGCGCCGCAGCCGTGCGGGCTCTGCTGGCGAGCGC<br/> TGATGGGGGTGCGCCAGAGTCAGGCTGAGGGATGCAGA<br/> GTGGCGGCCCGCCCGCCACCCAGATCTTCGCTGCGCCCT<br/> TGCCCGGACACGGCATCGCCACGATGGCTGCCCCGAG<br/> CCATGGGTGCGGGCCAGCTAACGCAGAACGTCCGTCC<br/> CTCGCCCGGCGAGTCCC GGAGCCAGCCCCGCGCCCCGC<br/> CAGCGCTGGTCCCTGAGGCCGACGACAGCAGCAGCCTT<br/> GCCTCAGCCTTCCCTTCCCGTCCCGGCCCCGCACTCCTC<br/> CCCCTGCTCGAGGCTGTGTGTCAGCACTTGGCTGGAGA<br/> CTTCTTGAAC TTGCCGGGAGAGTGACTTGGGCTCCCCAC<br/> TTCGCGCCGGTGTCTCGCCCGGCGGATCCAGTCTTGCC<br/> GCCTCCAGCCCGATCACCTCTCTTCCTCAGCCCGCTGGG<br/> CCCACCCCAAGACACAGTTCCCTACAGGGAGAACACCC<br/> GGAGAAGGAGGAGGAGGCGAAGAAAAGCAACAGAAG<br/> CCCAGTTGCTGCTCCAGGTCCCTCGGACAGAGCTTTTTTC<br/> C</p> |
| <p>B271-LUC<br/> (nt -241 to 30)<br/> 271bp</p> | <p>CTCAAGTTGAATATTGGCCCAATGAGGGAACTCAGAGGC<br/> CAGTGGACTCTGGATTTGCCCTAGTCTCCCGCAGCTGTG<br/> GGCGCGGATCCAGGTCCC GGGGGTTCGGCTTCACACTCAT<br/> CCGGGACGCGACCCCTTAGCGGCCGCGCGCTCGCCCCG<br/> CCCCGCTCCACCGCGGCCCGCCCCGTAGGGCGCGCCGTC<br/> CACACCCCTGCGCGCCGCTCCCGCCCCGCCCGGGGATCCC<br/> CGGCGCGCTGCGCCTCCGAGGGGGAGGTGTTCCGGCCAC<br/> G</p>                                                                                                                                                                                                                                                                                                                                                                                                                                                    |
